# Supplementary material for: Designing Microfluidic Devices to Sort Haematopoietic Stem Cells Based on Their Mechanical Properties
Source: Stem Cells Int. 2019 Sep 5;2019:8540706. doi: 10.1155/2019/8540706 (PMC6748184; doi:10.1155/2019/8540706)
Supplement: Supplementary 8 — Supplementary Videos show HSCs being directed to different outlets of spiral microfluidic devices depending on the flow rate used. [file 8540706.f8.zip]

Archive with 3 entries (3 files):
- Du et al - VIDEO 1 - low flow rate_SCI_2806296.mov
- Du et al - VIDEO 2 - medium flow rate_SCI_2806297.mp4
- Du et al - VIDEO 3 - high flow rate_SCI_2806298.mov
